# Supplementary material
Source: PubMed Central journal article supplement (PMC3626515)
Supplement: supp_12-10921_IOVS-12-10921-s01.pdf [file supp_12-10921_IOVS-12-10921-s01.pdf]

### **Supplemental Figure Legends**

**Supplemental Figure 1: Expression levels of miR-200 family members in the retina of Akita mice.** Retinal RNA from Akita and controls mice at age of nine months was extracted; 50 ng of purified RNA was used for cDNA synthesis and qRT-PCR analysis for miR-200 families was conducted as indicated. The expression levels of miR-200 families in the retina were normalized to the level of internal control (snRNA-U6) and expressed as the relative expression (Mean  $\pm$  SEM, n=7, \* p<0.05, n.s. p>0.05).

**Supplemental Figure 2: Expression of miR-200b at early stage of diabetes.** The retinal levels of miR-200b in the Akita mice at 3 months of age were analyzed by qRT-PCR and expressed as the fold change over that in the age-matched non-diabetic control (Mean  $\pm$  SEM, n=9 in WT, n=10 in Akita, n.s. p>0.05).

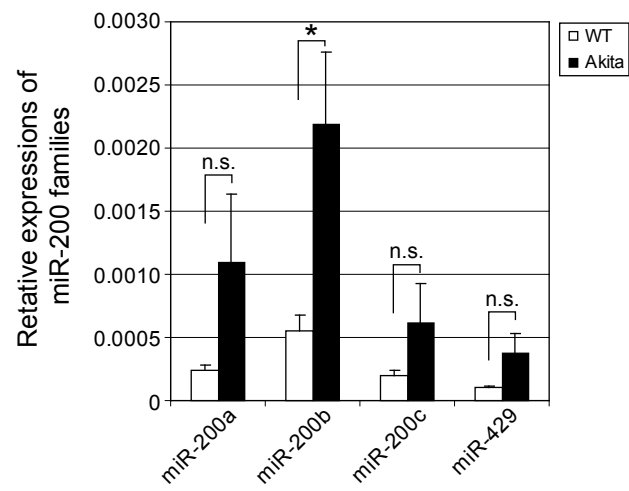

Supplemental Figure 1 A Murray et al

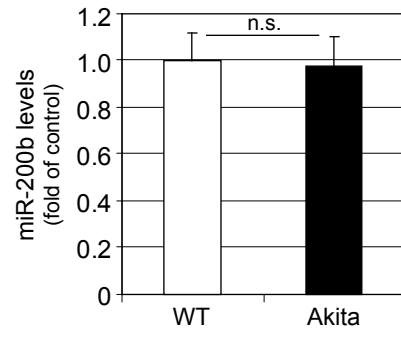

Supplemental Figure 2 A Murray et al
